# Supplementary material for: Factors Associated With Relapse and Treatment of Myelin Oligodendrocyte Glycoprotein Antibody–Associated Disease in the United Kingdom
Source: PubMed Central journal article supplement (PMC8749481; doi:10.1001/jamanetworkopen.2021.42780), 2022-01-10
Supplement: jamanetwopen-e2142780-s001.pdf [file jamanetwopen-e2142780-s001.pdf]

## Supplemental Online Content

Satukijchai C, Mariano R, Messina S, et al. Factors associated with relapse and treatment of myelin oligodendrocyte glycoprotein antibody–associated disease in the United Kingdom. *JAMA Netw Open*. 2022;5(1):e2142780.  
doi:10.1001/jamanetworkopen.2021.42780

**eFigure.** Clinical Phenotype in Relapsing Disease by Age Group  
**eTable 1.** Clinical Presentation at Onset in ADEM, Brain, and BS Subgroup  
**eTable 2.** Risk of Relapse by for Sex, Race, and Study Site in Total Cohort  
**eTable 3.** Covariates Included in Treatment Analysis

This supplemental material has been provided by the authors to give readers additional information about their work.

**eFigure.** Clinical Phenotype in Relapsing Disease by Age Group

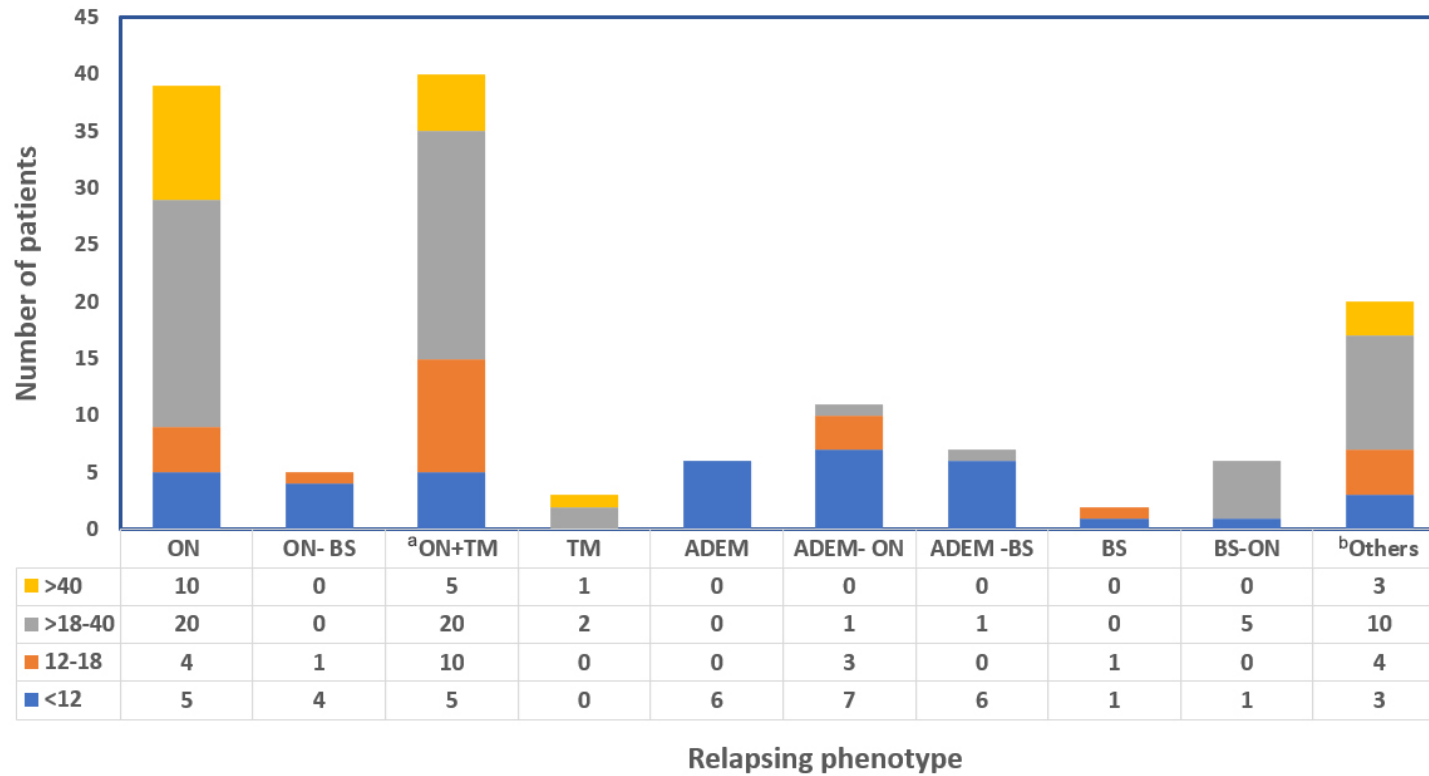

Abbreviations: ON, optic neuritis; TM, transverse myelitis; ADEM, acute disseminated encephalomyelitis; BS, Brainstem

<sup>a</sup>ON+TM either sequentially in any order or simultaneously

<sup>b</sup>Those who have 3 or more phenotypes during the course of their disease

**eTable 1.** Clinical Presentation at Onset in ADEM, Brain, and BS Subgroup

| ADEM/Brain/BS                                                         | Total cohort    |                     |                       |                        |                     | Incident cohort |
|-----------------------------------------------------------------------|-----------------|---------------------|-----------------------|------------------------|---------------------|-----------------|
|                                                                       | Total<br>(n=81) | <12 Years<br>(n=47) | 12-18 Years<br>(n=13) | >18-40 Years<br>(n=10) | >40 Years<br>(n=11) | Total<br>(n=52) |
| ADEM, n(%)                                                            | 55(62.5)        | 41(87.2)            | 9(69.2)               | 3(30)                  | 2(18.2)             | 39(75)          |
| ADEM alone, n                                                         | 43              | 32                  | 8                     | 2                      | 1                   | 31              |
| ADEM with <sup>a</sup> other presentations, n                         | 12              | 9                   | 1                     | 1                      | 1                   | 8               |
| Brain without encephalopathy, n(%)                                    | 10(12.3)        | 5(10.6)             | 2(15.4)               | 3(30)                  | 0                   | 6(11.5)         |
| Brain without encephalopathy alone, n                                 | 6               | 3                   | 1                     | 2                      | 0                   | 3               |
| Brain without encephalopathy with <sup>a</sup> other presentations, n | 4               | 2                   | 1                     | 1                      | 0                   | 3               |
| Brain stem, n(%)                                                      | 14(17.2)        | 1(2.1)              | 1(7.7)                | 3(30)                  | 9(81.8)             | 6(11.5)         |
| Brain stem alone, n                                                   | 8               | 1                   | 1                     | 1                      | 5                   | 3               |
| Brainstem with <sup>a</sup> other presentations, n                    | 6               | 0                   | 0                     | 2                      | 4                   | 3               |
| Cortical, n(%)                                                        | 2(3.6)          | 0                   | 0                     | 1(10)                  | 1                   | 2(3.8)          |
| Cortical with simultaneous ON and TM, n                               | 1               | 0                   | 0                     | 0                      | 1                   | 1               |
| Cortical with meningeal involvement, n                                | 1               | 0                   | 0                     | 1                      | 0                   | 1               |

Abbreviations: ADEM, acute disseminated encephalomyelitis, BS; Brainstem  
<sup>a</sup>other presentations; those including optic neuritis and or transverse myelitis

**eTable 2.** Risk of Relapse by for Sex, Race, and Study Site in Total Cohort

| Clinical Characteristic            | N   | Log rank, P- value | Cox proportional hazards regression, HR (95%CI), P-value |
|------------------------------------|-----|--------------------|----------------------------------------------------------|
| Sex                                |     | 0.25               | <b>Unadjusted</b>                                        |
| Female                             | 116 |                    | Reference                                                |
| Male                               | 110 |                    | 0.81 (0.58-1.16), 0.26                                   |
| Race                               |     | 0.10               | <b>Unadjusted</b>                                        |
| Asian total                        | 28  |                    | Reference                                                |
| Black                              | 8   |                    | 1.55 (0.55-4.35), 0.41                                   |
| White                              | 204 |                    | 0.76 (0.42-1.36), 0.35                                   |
| <sup>a</sup> Mixed race or other   | 6   |                    | 1.83 (0.65-5.13), 0.25                                   |
| Study site                         |     | 0.32               | <b>Adjusted with age at onset</b>                        |
| Oxford and outreach sites          | 146 |                    | Reference                                                |
| Liverpool                          | 65  |                    | 0.79 (0.53-1.17), 0.24                                   |
| Birmingham Children’s Hospital     | 32  |                    | 0.71 (0.39-1.30), 0.27                                   |
| Evelina Children’s Hospital London | 22  |                    | 0.47 (0.20-1.12), 0.09                                   |
| Cardiff Wales                      | 11  |                    | 0.46 (0.14-1.44), 0.18                                   |

<sup>a</sup>Individuals with mixed race and other race were those who self-identified as others outside of the categories listed in this table.

**eTable 3.** Covariates Included in Treatment Analysis

| Clinical Characteristic                | N                                                       | Cox proportional hazards regression, HR (95%CI), P-value |                                      |                 |
|----------------------------------------|---------------------------------------------------------|----------------------------------------------------------|--------------------------------------|-----------------|
|                                        |                                                         | Unadjusted                                               | Adjusted                             | Risk of relapse |
| Phenotype at onset                     |                                                         |                                                          |                                      |                 |
| ON                                     | 76                                                      | 2.66(1.01-6.98), 0.047                                   | 2.37(0.8-7), 0.120 <sup>a</sup>      | ↑               |
| TM                                     | 37                                                      | Reference                                                | Reference <sup>a</sup>               |                 |
| Phenotype at onset                     |                                                         |                                                          |                                      |                 |
| No TM                                  | 69                                                      | Reference                                                | Reference <sup>a</sup>               |                 |
| Any TM                                 | 114                                                     | 0.41 (0.20-0.82), 0.012                                  | 0.47 (0.22-1.0), 0.049 <sup>a</sup>  | ↓               |
| Age at onset                           |                                                         |                                                          |                                      |                 |
| >18-40                                 | 103                                                     | 2.10(0.94-4.69), 0.072                                   | 2.71 (1.18-6.19), 0.018 <sup>b</sup> | ↑               |
| >40                                    | 59                                                      | Reference                                                | Reference <sup>b</sup>               |                 |
| Number of relapses prior to IS therapy | Significant different among treatment group, $P < .001$ |                                                          |                                      |                 |

Abbreviations: ON; Optic neuritis, TM; Transverse myelitis, IS; immunosuppression/immunomodulation

<sup>a</sup>Adjusted covariate for phenotype at onset; follow on oral prednisolone

<sup>b</sup>Adjusted covariate for age at onset; any TM at onset and Isolated ON at onset
